# Supplementary material
Source: PubMed Central journal article supplement (PMC3188839)
Supplement: mmc1.pdf [file mmc1.pdf]

**The American Journal of Human Genetics, Volume 89  
Supplemental Data**

**Assessment of 2q23.1 Microdeletion Syndrome Implicates  
MBD5 as a Single Causal Locus of Intellectual  
Disability, Epilepsy, and Autism Spectrum Disorder**

**Michael E. Talkowski, Sureni V. Mullegama, Jill A. Rosenfeld, Bregje WM van Bon, Yiping Shen, Elena A. Repnikova, Julie Gastier-Foster, Devon Lamb Thrush, Sekar Kathiresan, Douglas M. Ruderfer, Colby Chiang, Carrie Hanscom, Carl Ernst, Amelia M. Lindgren, Cynthia C. Morton, Yu An, Caroline Astbury, Louise A. Brueton, Klaske D. Lichtenbelt, Lesley C. Ades, Marco Fichera, Corrado Romano, Jeffrey W. Innis, Charles A Williams, Dennis Bartholomew, Margot I. Van Allen, Aditi Parikh, Lilei Zhang, Bai-Lin Wu, Robert E. Pyatt, Stuart Schwartz, Lisa G. Shaffer, Bert BA de Vries, James F. Gusella, and Sarah H. Elsea**

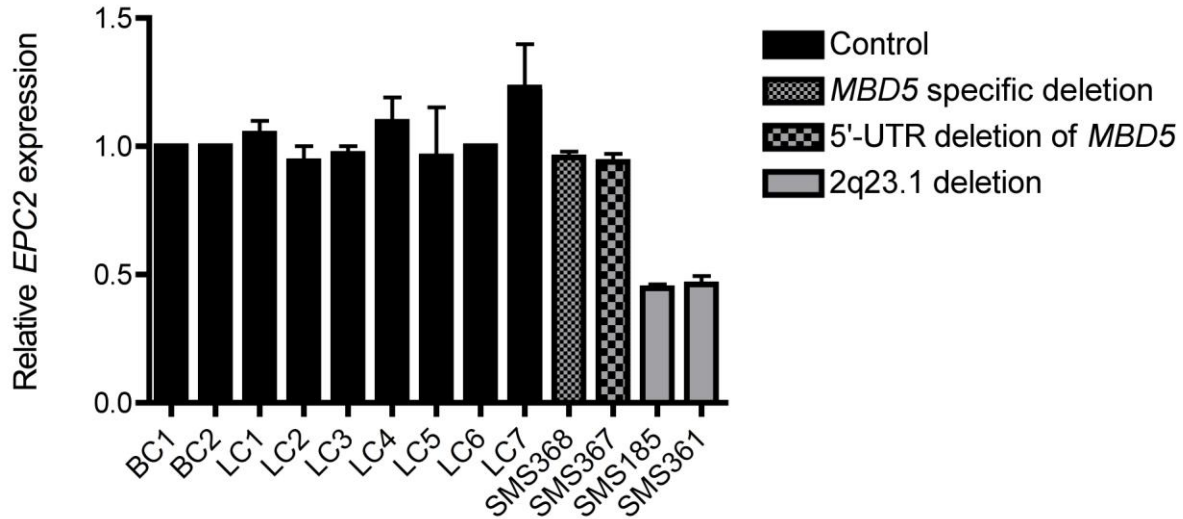

**Figure S1. *EPC2* Expression Is Normal in *MBD5*-Specific Deletion Cases**

Quantitative real-time PCR (q-RT-PCR) mRNA expression analysis of *EPC2* in lymphoblastoid cell lines or fresh white blood cells from 2q23.1 deletion syndrome individuals with no deletions for *EPC2* but having *MBD5* deletions was done (SMS367, SMS368). Fresh white blood cells or lymphoblastoid cell lines from nine unaffected (no *MBD5* deletion) subjects were used as normal controls. Results were normalized to *GAPDH* expression. Relative expression values are based on the  $\Delta\Delta C_t$  value. Expression of all controls was normalized to 1. Each bar represents mean ( $\pm$  SEM) of values from 3 independent experiments. Data show a normal range, 0.88 to 1.19-fold *EPC2* expression in lymphocytes (BC1-2) and lymphoblastoid cell lines, (LCL1-4). SMS367 and SMS368 cases were not deleted for *EPC2*, and data show 92-100% expression of *EPC2*, which is a normal range of expression for *EPC2*. SMS185 and SMS361 were previously reported cases with larger 2q23.1 deletions including both *EPC2* and *MBD5* (Williams et al 2010).

**Table S1. MBD5 Primer Sequences**

| Exon          | Exon_Start       | Exon_Stop        | F Primer  | Primer Sequence (Chr2+)  | F_chr2_strand+         | R Primer  | Primer Sequence (Chr2-)   | R_chr2_strand-         |
|---------------|------------------|------------------|-----------|--------------------------|------------------------|-----------|---------------------------|------------------------|
| MBD5-001 ex1  | <b>148495050</b> | <b>148495085</b> |           |                          |                        |           |                           |                        |
| MBD5-001 ex2  | <b>148495687</b> | <b>148495723</b> | MBD5_1-2F | GCTACAATGTCTTCCGGGTC     | 148494966<br>148494985 | MBD5_1-2R | GTGGTTTGGTGCTACTGTTGC     | 148495781<br>148495801 |
| MBD5-001 ex3  | <b>148652739</b> | <b>148652832</b> | MBD5_3F   | GTCCTATAATACATCCCTTTGCC  | 148652603<br>148652625 | MBD5_3R   | GGTAACTTAGACAGGAGCAGTG    | 148652926<br>148652947 |
| MBD5-001 ex4  | <b>148707284</b> | <b>148707434</b> | MBD5_4F   | CAAGCCCTTTCTGTTAGAGTC    | 148707134<br>148707154 | MBD5_4R   | CATGCATACATAAATTCCTACAGG  | 148707535<br>148707558 |
| MBD5-001 ex5  | <b>148816253</b> | <b>148816375</b> | MBD5_5F   | CTGAAGGATGAAGATACTAATACC | 148816100<br>148816123 | MBD5_5R   | CAATCTATAGATGTCAGACACTTCC | 148816455<br>148816479 |
| MBD5-001 ex6  | <b>148932242</b> | <b>148932910</b> | MBD5_6F   | TGTGATTGGGTACACTTCGTAG   | 148932141<br>148932162 | MBD5_6R   | TGCCATCAGTCACCATGCTTG     | 148932973<br>148932993 |
| MBD5-001 ex7  | 148936621        | 148936723        | MBD5_7F   | ATATCCCATAAAGGACAGTAAGAC | 148936521<br>148936544 | MBD5_7R   | GATACAGCTCTAATGAAAAGGTAG  | 148936969<br>148936992 |
| MBD5-001 ex8  | 148937778        | 148937958        | MBD5_8F   | CTGTTAGAACATCAGGAGGTATC  | 148937480<br>148937502 | MBD5_8R   | GCATTGTGCGTGCCTGAAAAG     | 148938048<br>148938068 |
| MBD5-001 ex9  | 148942380        | 148944500        | MBD5_9F   | CACCACAAAAGAGTTGAGACTG   | 148942325<br>148942346 | MBD5_9R   | TCCCAATAGACAAATCCCTAGC    | 148944656<br>148944677 |
| MBD5-001 ex10 | 148957149        | 148957475        | MBD5_10F  | GTTACAATCAATGAAGGTGCCATG | 148957022<br>148957045 | MBD5_10R  | GCTAAAGCAGCGTTTACATTCC    | 148957518<br>148957539 |
| MBD5-001 ex11 | 148959781        | 148959989        | MBD5_11F  | TCGGGTACAAAGAGAGGCATC    | 148959709<br>148959729 | MBD5_11R  | GTGAAAGGGCACGTAACCTAC     | 148960074<br>148960094 |
| MBD5-001 ex12 | 148963425        | 148964633        | MBD5_12F  | CTGAGTACGTTTTCTGTCCAGC   | 148963125<br>148963146 | MBD5_12R  | TCCAGAAGCTTGTGAGACCTC     | 148964752<br>148964772 |
| MBD5-001 ex13 | 148976475        | 148976548        | MBD5_13F  | GGACAGAAGATTTGACAAGGTAG  | 148976332<br>148976354 | MBD5_13R  | GCTTGTCTATAATGGTCCTCTTTG  | 148976677<br>148976700 |
| MBD5-001 ex14 | 148984099        | 148984174        | MBD5_14F  | GGCTTTCTCTCGTGGAATTGG    | 148983994<br>148984014 | MBD5_14R  | CAGAAAGCTGTGGTTTGAAC TTC  | 148984438<br>148984460 |
| MBD5-001 ex15 | <b>148986909</b> | <b>148987490</b> | MBD5_15F  | GCATTCTGCATTCTCTGTAGTG   | 148986710<br>148986731 | MBD5_15R  | CAGTGGTGTGCAGTGTATGTC     | 148987576<br>148987596 |

Bold = non-coding exon.
